# Supplementary material
Source: publisher figshare collection journal article supplement (https://karger.figshare.com/ndownloader/files/25608785)
Supplement: Supplementary file 1 [file 25608785]

# Vitamin D

## Essential to Life

Vitamin D is an essential nutrient, supporting bone health and vital functions such as the immune system from conception through childhood and into adulthood. What does Vitamin D do and how do you make sure children get enough?

## What is Vitamin D?

Vitamin D is a prohormone that enters the body through a precursor in your skin. It is then transformed into its active form in the liver and kidneys. If children don't receive enough vitamin D, supplements may be needed.

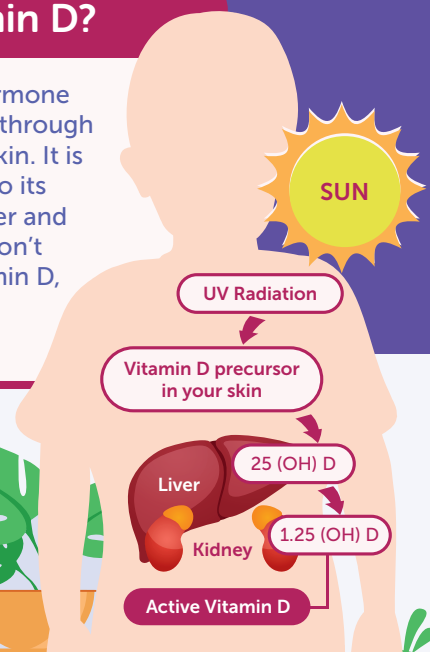

## Vitamin D is important for

- ✓ Cell growth and differentiation
- ✓ Healthy immune system
- ✓ Cardiovascular function
- ✓ Skeletal health
- ✓ Reducing the risk of infectious and allergic disease
- ✓ Maintaining appropriate balance of calcium and phosphate

## Foods rich in Vitamin D

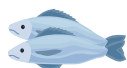

Oily fish

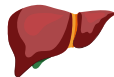

Organ meat such as liver

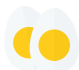

Egg yolks

## Vitamin D for different stages of life

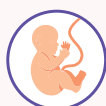

Low Vitamin D during pregnancy has been associated with problems including preterm birth and preeclampsia

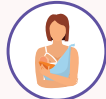

Breast milk may not give babies all the Vitamin D they need, so supplementation is required

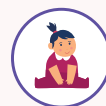

Children aged 1 to 3 years commonly have low Vitamin D levels, especially if they do not consume fortified foods

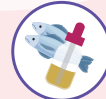

Children get Vitamin D from food or exposure to UV light, but supplements are often needed

|                                      | Infants                                                                                                                                             | Children aged 1-10                     | Children aged 11-17 |
|--------------------------------------|-----------------------------------------------------------------------------------------------------------------------------------------------------|----------------------------------------|---------------------|
| <b>Recommendations</b>               | 10mcg/day (AAP, ESPGHAN)                                                                                                                            | 10mcg/day (AAP)<br>15mcg/day (IOM)     |                     |
| <b>Upper limits</b>                  | 25 mcg/day                                                                                                                                          | 50 mcg/day                             | 100 mcg/day         |
| <b>Effect of deficiency</b>          | Osteopenia, poor bone mineralization and rickets                                                                                                    | Impact on children's growth and health |                     |
| <b>How to ensure adequate intake</b> | <b>Formula Fed:</b> No need for additional supplementation<br><b>Breastfed:</b> Use of drops, soluble strips, increase maternal intake of vitamin D | Food fortification                     |                     |

Public Health England data indicates deficiency (25(OH)D level of <25 nmol/L) in

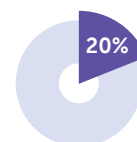

Boys (Aged 11-18)

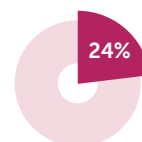

Girls (Aged 11-18)

Current thresholds for vitamin D deficiency and sufficiency and recommended daily supplementation in children

| Public health organization | Deficiency                                 | Sufficiency            |
|----------------------------|--------------------------------------------|------------------------|
| <b>AAP</b>                 | < 50 nmol/L of 25(OH)D                     | N/A                    |
| <b>ESPGHAN</b>             | < 25 nmol/L of 25(OH)D (severe deficiency) | > 50 nmol/L of 25(OH)D |

**General recommendation for children: Vitamin D supplements of 10-50 µg/day**

Annals Nestlé  
Vol. 77, No 3, 2019

Annals of Nutrition and Metabolism  
76/S2/20

**NNI** Nestlé Nutrition Institute

**Karger**
